# Supplementary material for: Targeting a chemorefractory COLO205 (BRAF V600E) cell line using substituted benzo[α]phenoxazines
Source: Royal Society of Chemistry journal article supplement (doi:10.1039/c5ra14949e), 2015-01-01
Supplement: c5ra14949e1.pdf [file c5ra14949e1.pdf]

## **Targeting chemorefractory COLO205 (B-Raf V600E) cell lines using substituted benzo[ $\alpha$ ]phenoxazines**

Sanjima Pal<sup>a</sup>, V Badireenath Konkimalla<sup>\*a</sup>, Laxmi Kathawate<sup>b</sup>, Soniya S. Rao<sup>b</sup>, Shridhar P. Gejji<sup>b</sup>, Vedavati G. Puranik<sup>c</sup>, Thomas Weyhermüller<sup>d</sup> Sunita Salunke-Gawali<sup>\*b</sup>

## Supplementary information

## Figure Legends

Fig. S1 HR-MS spectra of **1B**

Fig. S2 FT-IR spectrums of **1B** in region  $4000\text{ cm}^{-1}$  to  $400\text{ cm}^{-1}$

Fig. S3 a)  $^1\text{H}$ , b)  $^{13}\text{C}$  NMR spectra of **1B**

Fig. S4 2D gHSQCAD NMR spectra of **1B**

Fig. S5 HR-MS spectra of **2B**

Fig. S6 FT-IR spectrums of **2B** in region  $4000\text{ cm}^{-1}$  to  $400\text{ cm}^{-1}$

Fig. S7 a)  $^1\text{H}$ , b)  $^{13}\text{C}$  NMR spectra of **2B**

Fig. S8 2D gHSQCAD NMR spectra of **2B**

Fig. S9 HR-MS spectra of **3B**

Fig. S10 FT-IR spectrums of **3B** in region  $4000\text{ cm}^{-1}$  to  $400\text{ cm}^{-1}$

Fig. S11 a)  $^1\text{H}$ , b)  $^{13}\text{C}$  NMR spectra of **3B**

Fig. S12 2D gHSQCAD NMR spectra of **3B**

Fig.S13 Cyclic voltammograms of **1B**, **2B** and **3B**

Fig.S14 Hydrogen bonding of oppositely oriented molecules of **1B** to **3B**

Fig.S15 Hydrogen bonding interactions to neighboring molecules of **2B**

Fig.S16 Slipped  $\pi$ - $\pi$  stacked interaction of **2B** molecules

Fig.S17 Optimized structures of **1B**, **2B** and **3B** from the M06-2x theory.

## Table legends

Table S1 Bond lengths [Å] and angles [°] for **2B**

Table S2 Atomic coordinates ( $\times 10^4$ ) and equivalent isotropic displacement parameters ( $\text{Å}^2 \times 10^3$ ) for **2B**.  $U(\text{eq})$  is defined as one third of the trace of the orthogonalized  $U_{ij}$  tensor

Table S3 Anisotropic displacement parameters ( $\text{Å}^2 \times 10^3$ ) for **2B**, The anisotropic displacement factor exponent takes the form:  $-2\pi^2 [h^2 a^{*2} U^{11} + \dots + 2 h k a^* b^* U^{12}]$

Table S4 Hydrogen coordinates ( $\times 10^4$ ) and isotropic displacement parameters ( $\text{Å}^2 \times 10^3$ ) for **2B**

Table S5 Bond lengths [Å] and angles [°] for **3B**

Table S5 Atomic coordinates ( $\times 10^4$ ) and equivalent isotropic displacement parameters ( $\text{Å}^2 \times 10^3$ ) for **3B**.  $U(\text{eq})$  is defined as one third of the trace of the orthogonalized  $U_{ij}$  tensor

Table S6 Anisotropic displacement parameters ( $\text{Å}^2 \times 10^3$ ) for **3B**. The anisotropic displacement factor exponent takes the form:  $-2\pi^2 [h^2 a^{*2} U^{11} + \dots + 2 h k a^* b^* U^{12}]$

Table S7 Hydrogen coordinates ( $\times 10^4$ ) and isotropic displacement parameters ( $\text{Å}^2 \times 10^3$ ) for **3B**

Table S8 Torsion angles [°] for **3B**

**Savitribai Phule Pune University - Central Instrumentation Facility**

**Analysis Info**

|               |                                                     |                  |                      |               |
|---------------|-----------------------------------------------------|------------------|----------------------|---------------|
| Analysis Name | D:\Data\DR.SALUNKE\DATTATRAY CHADAR\1B_BA6_01_471.d | Acquisition Date | 3/10/2015 1:35:41 PM |               |
| Method        | hplc-ms600mz.m                                      | Operator         | CIF                  |               |
| Sample Name   | 1B                                                  | Instrument       | impact HD            | 1819696.00184 |
| Comment       |                                                     |                  |                      |               |

**Acquisition Parameter**

|             |         |                      |          |                  |           |
|-------------|---------|----------------------|----------|------------------|-----------|
| Source Type | ESI     | Ion Polarity         | Positive | Set Nebulizer    | 0.3 Bar   |
| Focus       | Active  | Set Capillary        | 3800 V   | Set Dry Heater   | 200 °C    |
| Scan Begin  | 50 m/z  | Set End Plate Offset | -500 V   | Set Dry Gas      | 4.0 l/min |
| Scan End    | 600 m/z | Set Charging Voltage | 2000 V   | Set Divert Valve | Waste     |
|             |         | Set Corona           | 0 nA     | Set APCI Heater  | 0 °C      |

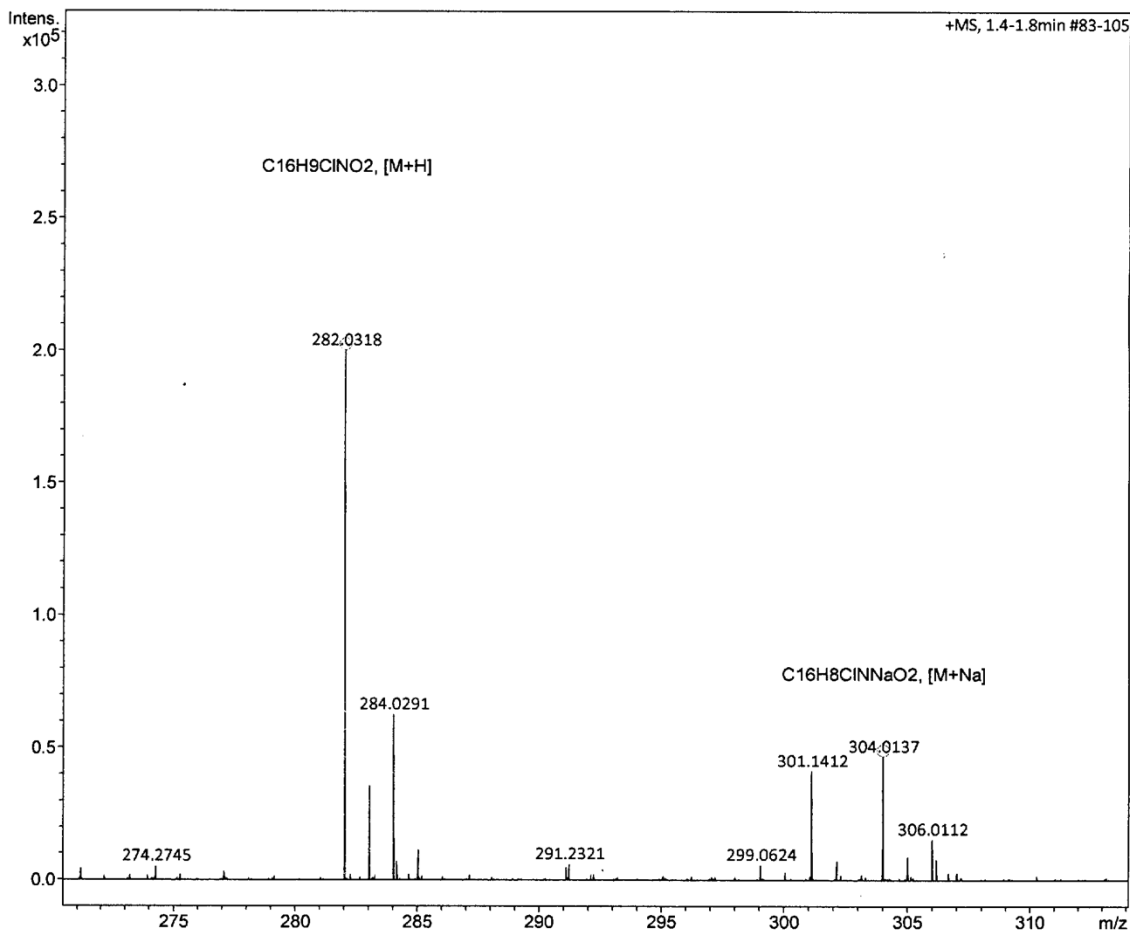

| Meas. m/z | # | Ion Formula  | m/z      | err [ppm] | mSigma | # mSigma | Score  | rdb  | e <sup>-</sup> Conf | N-Rule | Adduct |
|-----------|---|--------------|----------|-----------|--------|----------|--------|------|---------------------|--------|--------|
| 282.0318  | 1 | C16H9CINO2   | 282.0316 | -0.6      | 13.0   | 1        | 100.00 | 12.5 | even                | ok     | M+H    |
| 304.0137  | 1 | C16H8CINNaO2 | 304.0136 | -0.5      | 6.2    | 1        | 100.00 | 12.5 | even                | ok     | M+Na   |

1B\_BA6\_01\_471.d

Bruker Compass DataAnalysis 4.2

printed: 3/10/2015 1:42:59 PM

by: CIF

Page 1 of 1

**Fig. S1 HR-MS spectra of 1B**

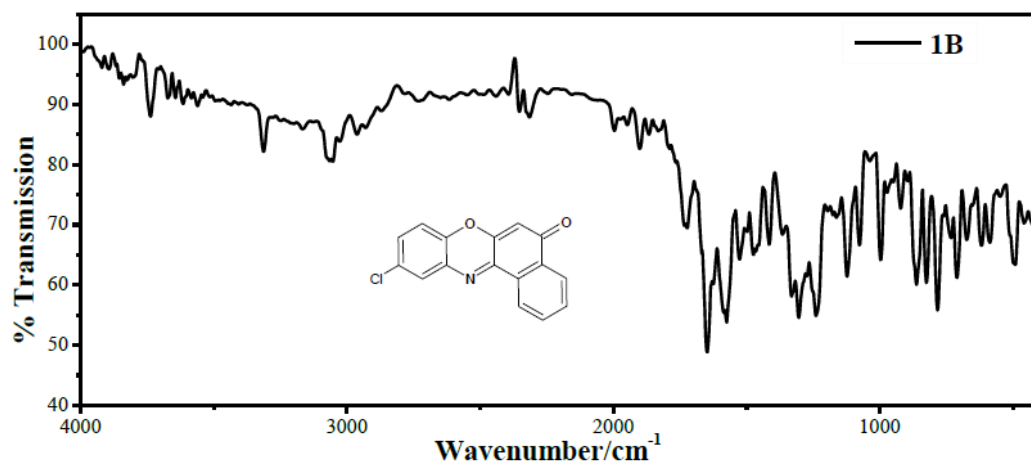

Fig.S2 FT-IR spectrums of **1B** in region 400 cm<sup>-1</sup> to 4000 cm<sup>-1</sup>

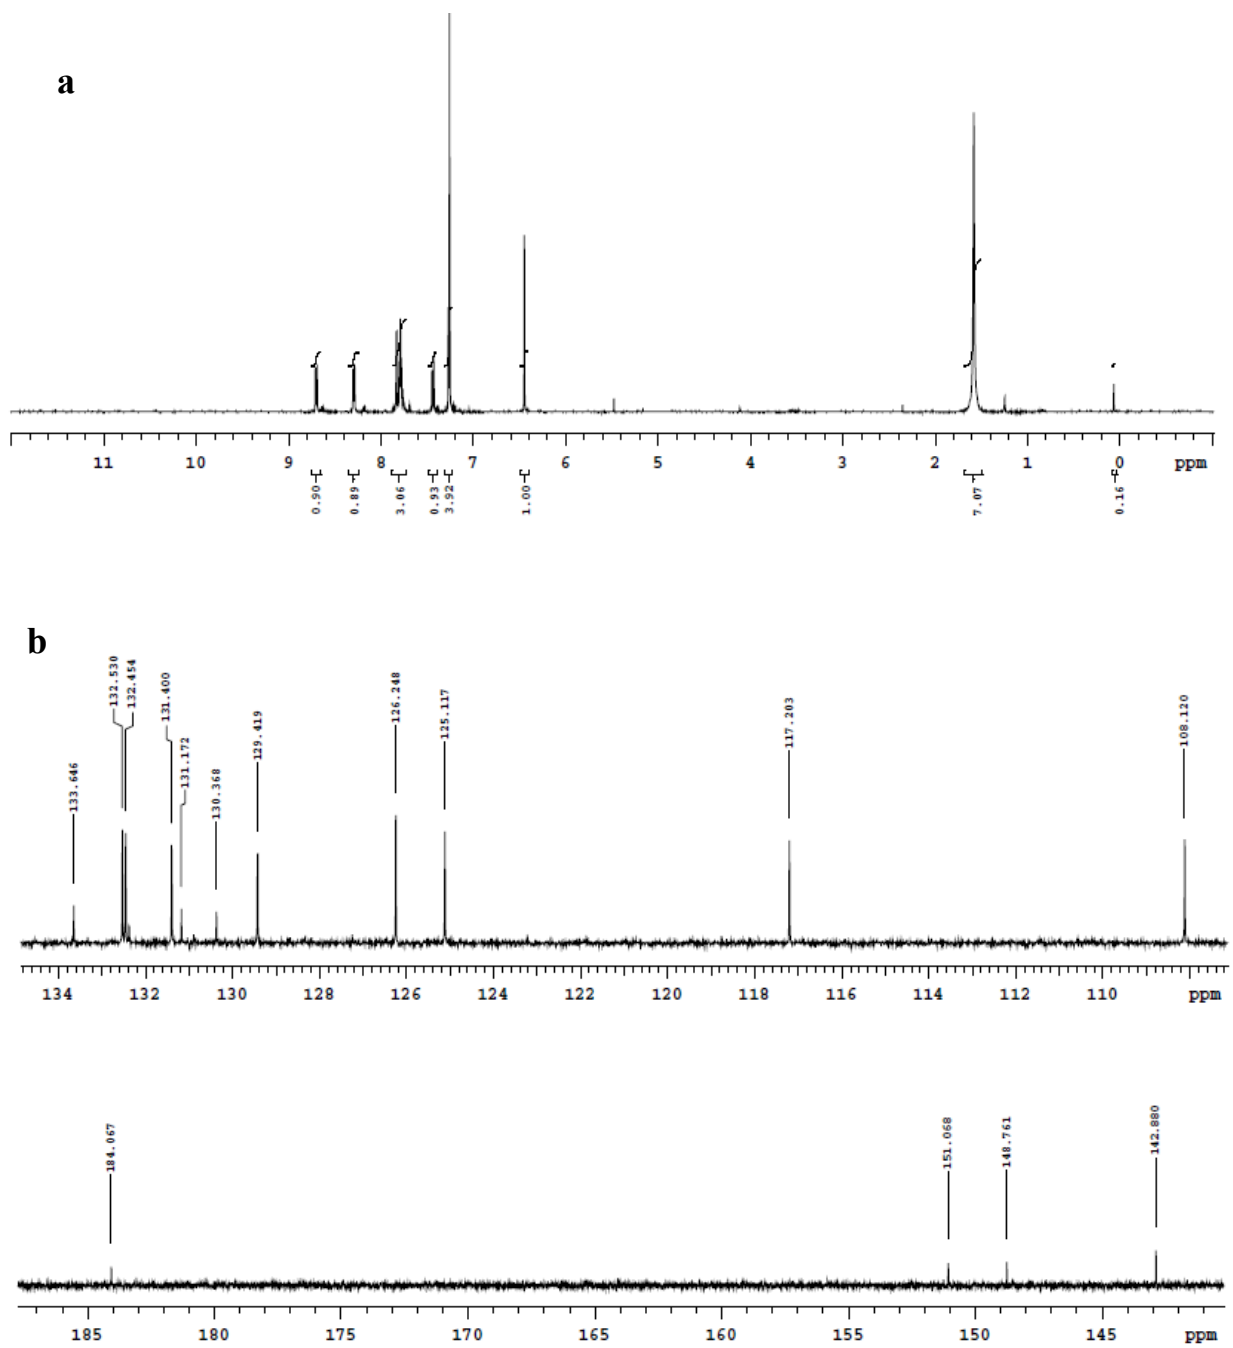

Fig. S3 a)  $^1\text{H}$ , b)  $^{13}\text{C}$  NMR spectra of **1B**

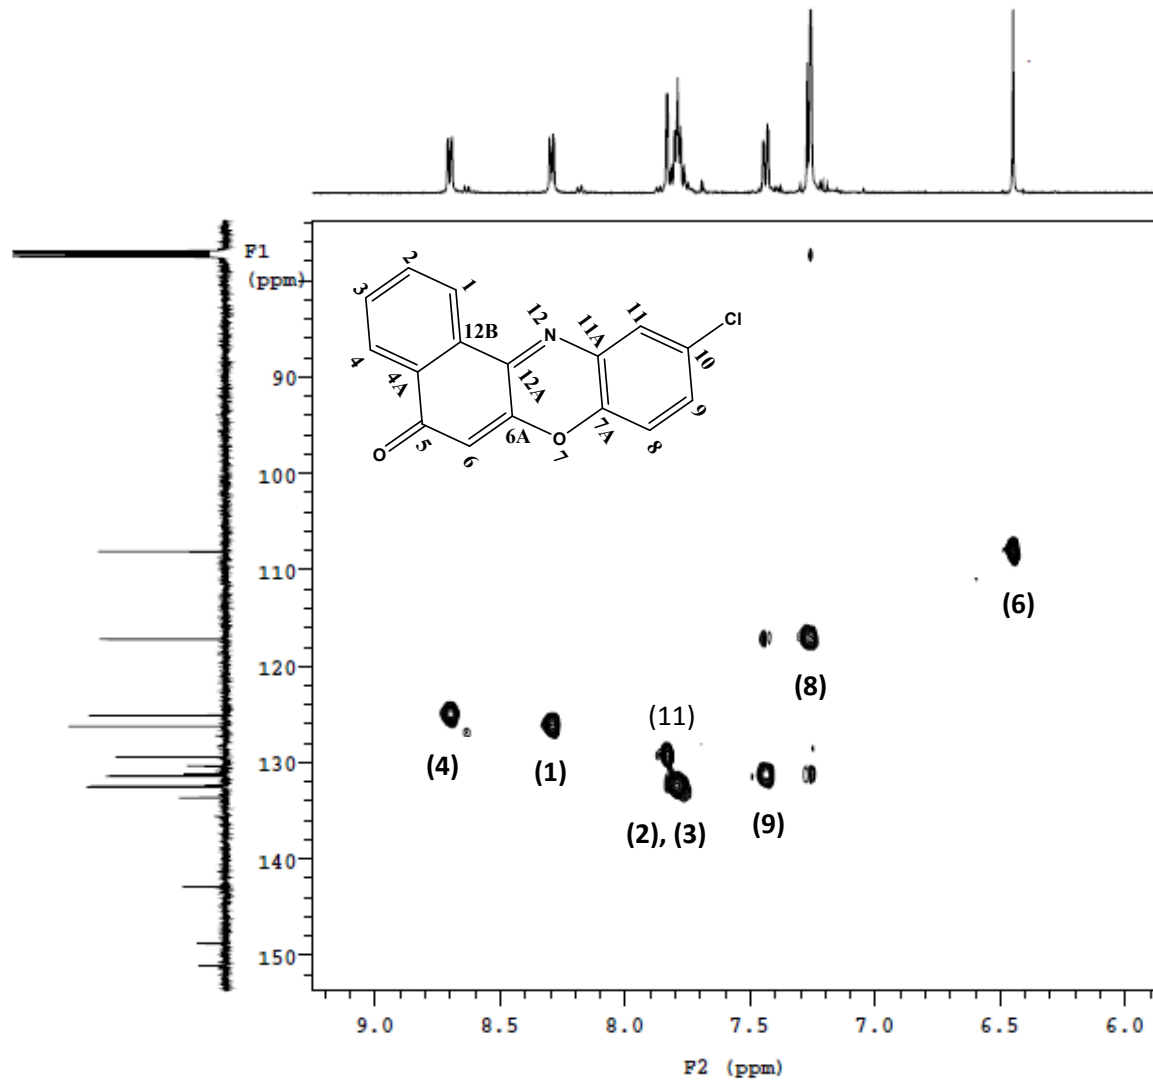

Fig. S4 2D gHSQCAD NMR spectra of **1B**

**Interpretation of the 2D gHSQCAD NMR of 1B that shows the correlation between the Carbon and Proton**

Spot (6) show the correlation between the proton i.e. observed at 6.449 ppm (C6-H) in proton NMR and the carbon observed at 108.12 ppm in carbon NMR.

Spot (8) show the correlation between the proton i.e. observed at 7.265 ppm (C8-H) in proton NMR and the carbons observed at 117.2 ppm in carbon NMR.

Spot (4) show the correlation between the proton i.e. observed at 8.295 ppm (C4-H) in proton NMR and the carbon observed at 126.24 ppm in carbon NMR.

Spot (1) show the correlation between the proton i.e. observed at 8.701 ppm (C1-H) in proton NMR and the carbon observed at 125.11 ppm in carbon NMR.

Spot (2, 3) show the correlation between the protons i.e. observed multiplet at 7.796 ppm (C2-H, C3-H) in proton NMR and the carbon observed at 132.45 (C2) ppm and 132.53 (C3) ppm carbons NMR.

Spot (11) show the correlation between the proton i.e. observed at 7.835 ppm (C11-H) in proton NMR and the carbon observed at 129.41 ppm in carbon NMR

Spot (9) show the correlation between the proton i.e. observed at 7.437 ppm (C9-H) in proton NMR and the carbon observed at 131.40 ppm in carbon NMR.



**Savitribai Phule Pune University - Central Instrumentation Facility**

**Analysis Info**

|               |                                                     |                  |                       |               |
|---------------|-----------------------------------------------------|------------------|-----------------------|---------------|
| Analysis Name | D:\Data\DR.SALUNKE\DATTATRAY CHADAR\2B_BA5_01_468.d | Acquisition Date | 3/10/2015 11:22:12 AM |               |
| Method        | hplc-ms600mz.m                                      | Operator         | CIF                   |               |
| Sample Name   | 2B                                                  | Instrument       | impact HD             | 1819696.00184 |
| Comment       |                                                     |                  |                       |               |

**Acquisition Parameter**

|             |         |                      |          |                  |           |
|-------------|---------|----------------------|----------|------------------|-----------|
| Source Type | ESI     | Ion Polarity         | Positive | Set Nebulizer    | 0.3 Bar   |
| Focus       | Active  | Set Capillary        | 3800 V   | Set Dry Heater   | 200 °C    |
| Scan Begin  | 50 m/z  | Set End Plate Offset | -500 V   | Set Dry Gas      | 4.0 l/min |
| Scan End    | 600 m/z | Set Charging Voltage | 2000 V   | Set Divert Valve | Waste     |
|             |         | Set Corona           | 0 nA     | Set APCI Heater  | 0 °C      |

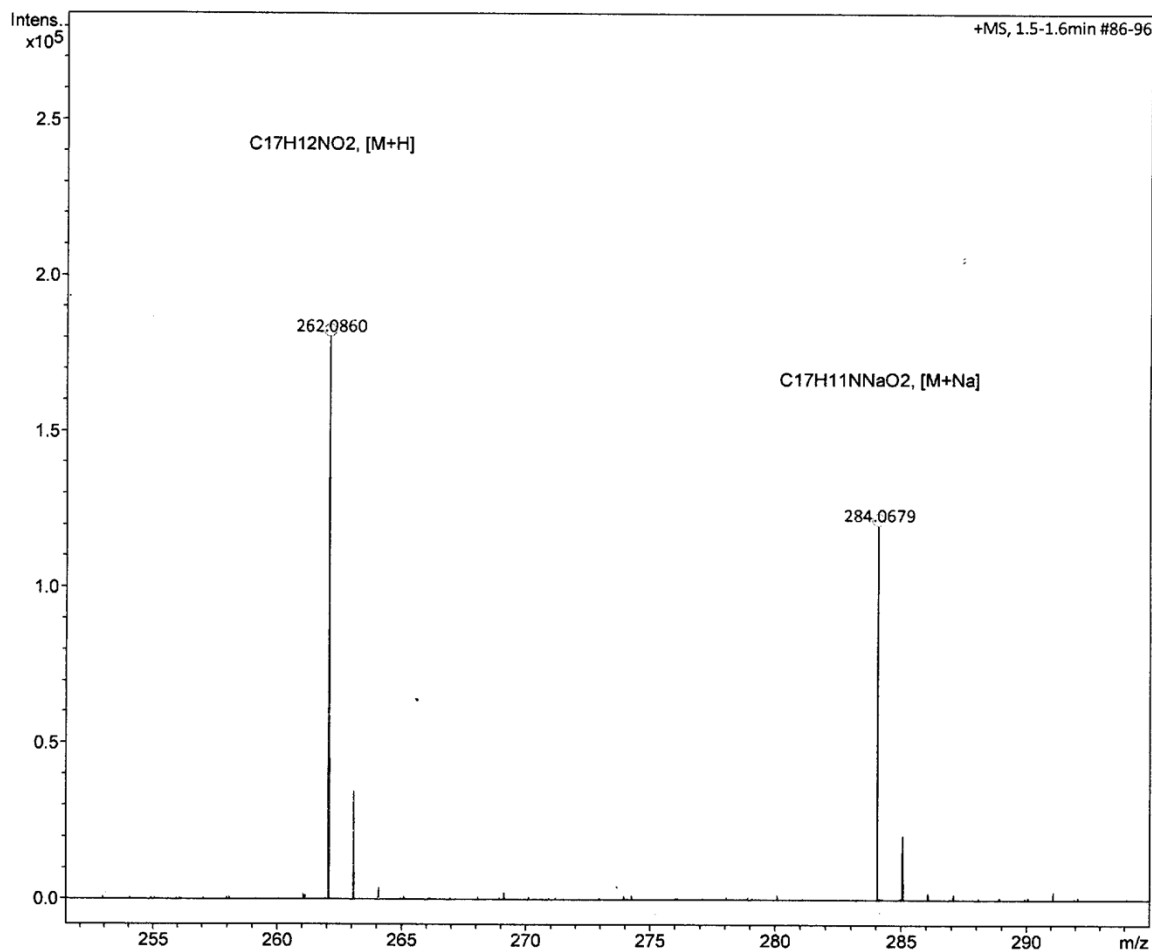

| Meas. m/z | # | Ion Formula | m/z      | err [ppm] | mSigma | # mSigma | Score  | rdb  | e <sup>-</sup> Conf | N-Rule | Adduct |
|-----------|---|-------------|----------|-----------|--------|----------|--------|------|---------------------|--------|--------|
| 262.0860  | 1 | C17H12NO2   | 262.0863 | 1.1       | 1.8    | 1        | 100.00 | 12.5 | even                | ok     | M+H    |
| 284.0679  | 1 | C17H11NNaO2 | 284.0682 | 1.1       | 10.3   | 1        | 100.00 | 12.5 | even                | ok     | M+Na   |

2B\_BA5\_01\_468.d

3ruker Compass DataAnalysis 4.2

printed: 3/10/2015 12:00:14 PM

by: CIF

Page 1 of 1

Fig. S5 HR-MS spectra of **1B**

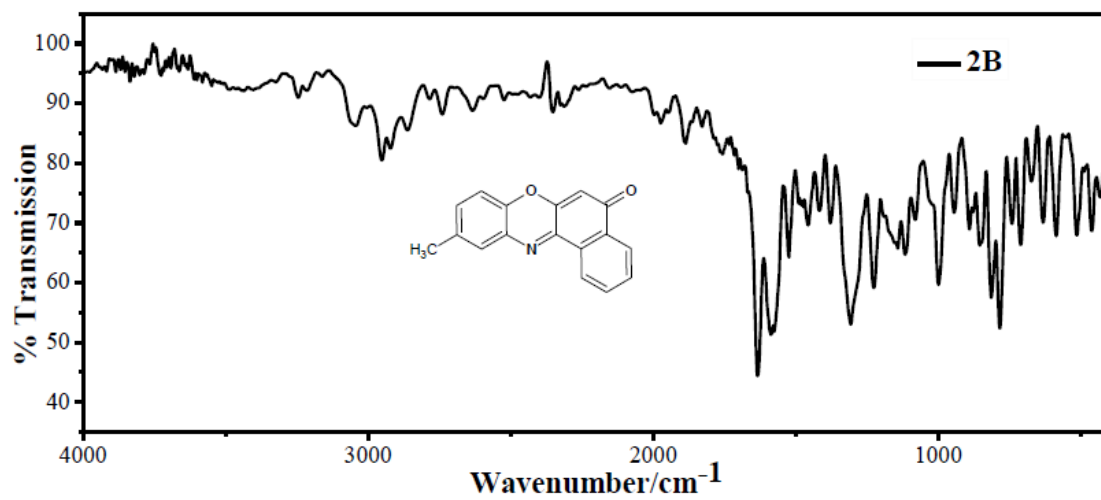

Fig. S6 FT-IR spectrums of **2B** in region 400 cm<sup>-1</sup> to 4000 cm<sup>-1</sup>

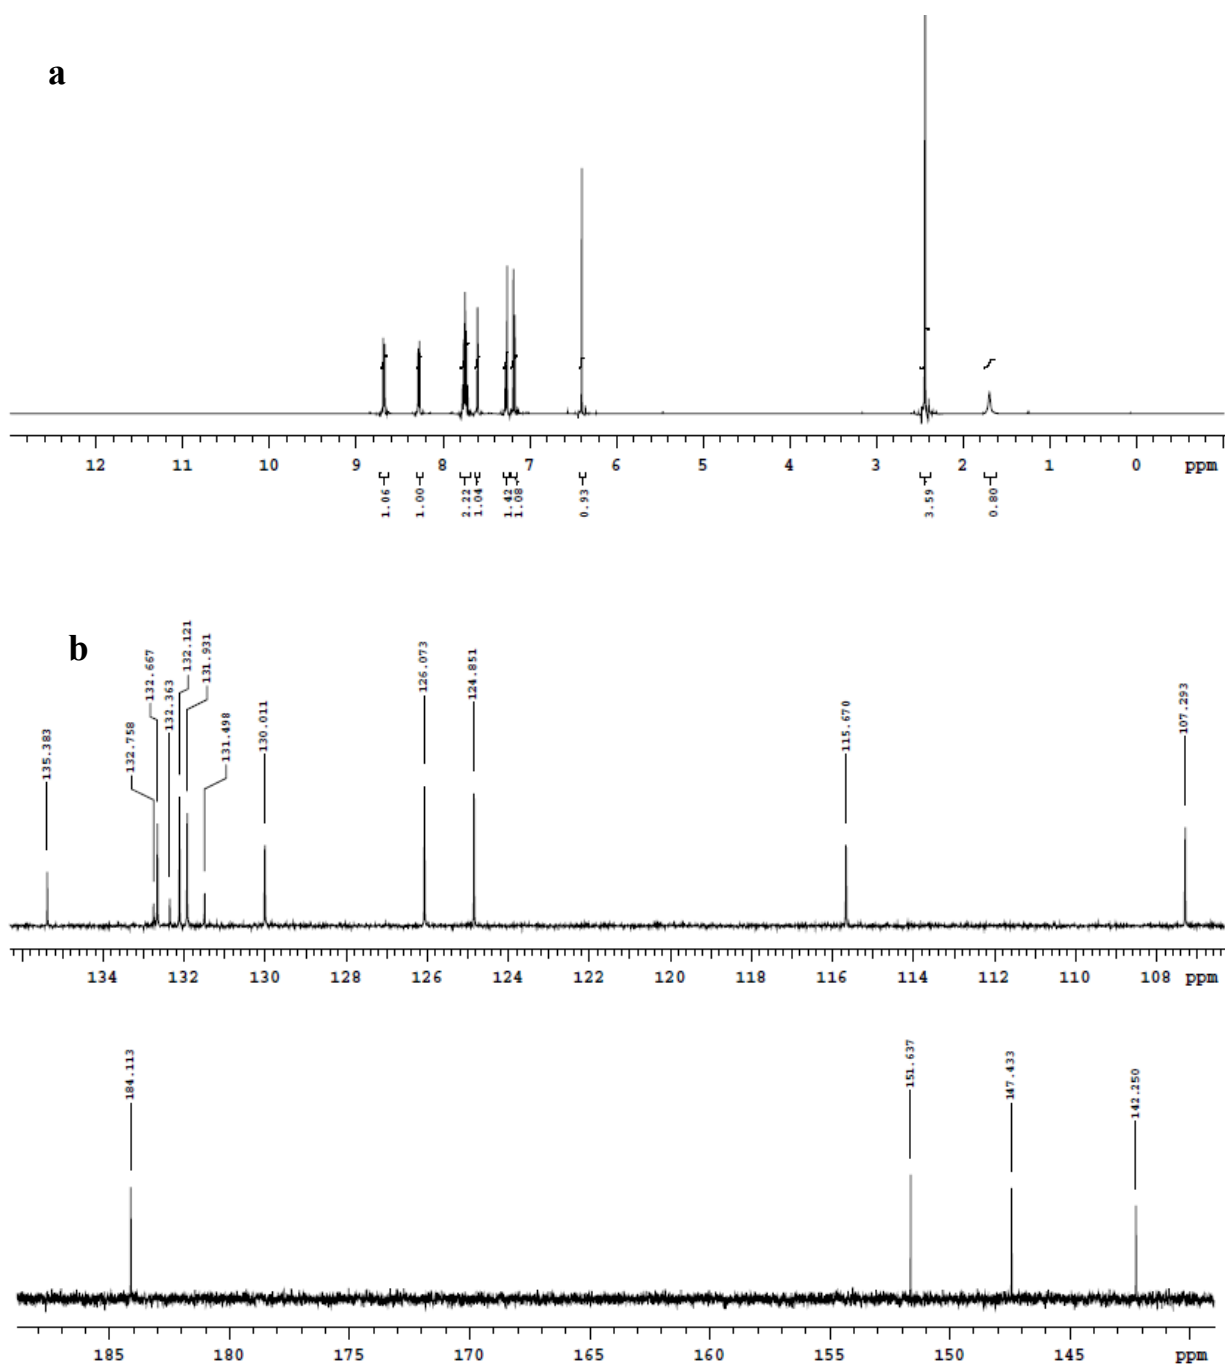

Fig. S7 a)  $^1\text{H}$ , b)  $^{13}\text{C}$  NMR spectra of **2B**

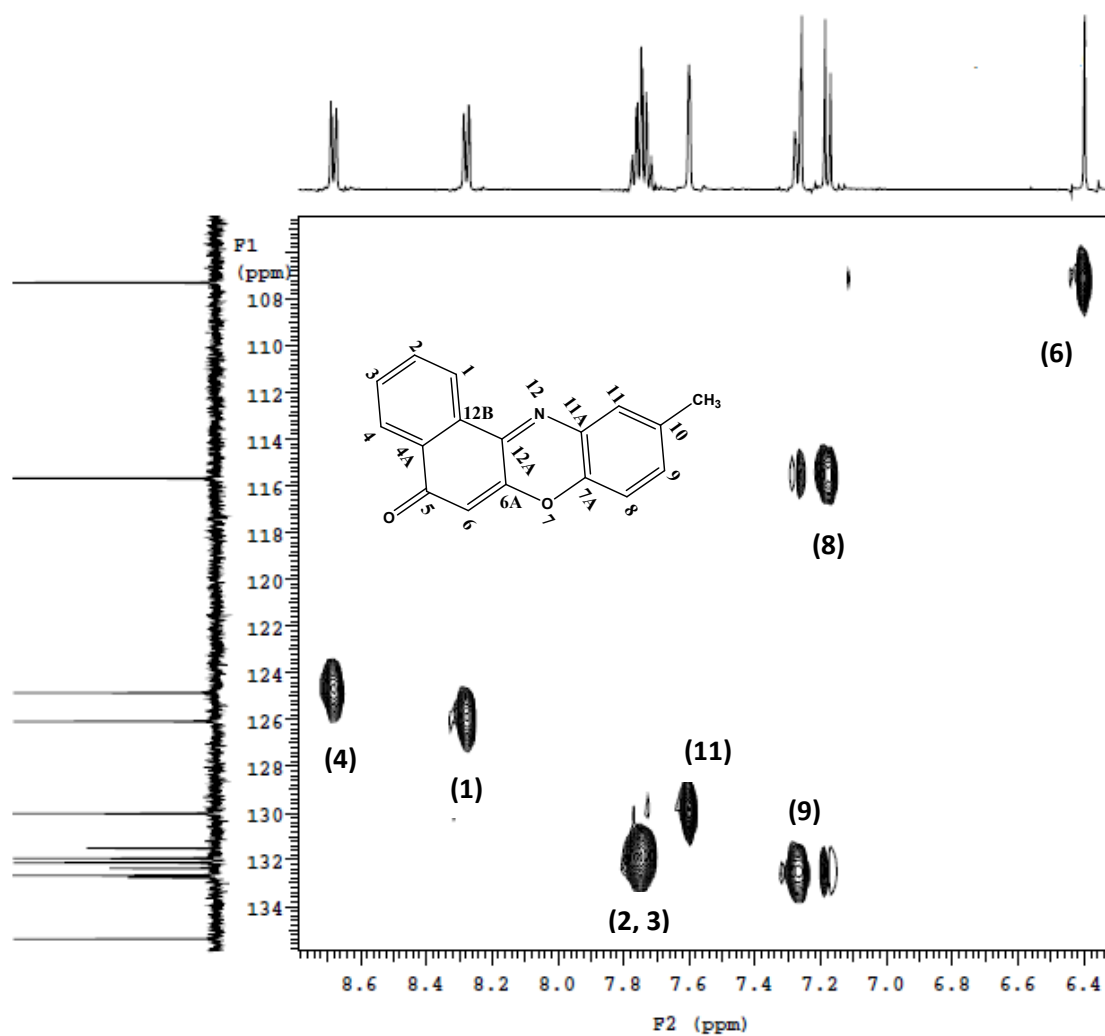

Fig. S82D gHSQCAD NMR spectra of **2B**

**Interpretation of the 2D gHSQCAD NMR of 2B that shows the correlation between the Carbon and Proton**

Spot (6) show the correlation between the proton i.e. observed at 6.399 ppm (C6-H) in proton NMR and the carbon observed at 107.29 ppm in carbon NMR.

Spot (8) show the correlation between the proton i.e. observed at 7.179 ppm (C8-H) in proton NMR and the carbon observed at 115.67 ppm in carbon NMR.

Spot (4) show the correlation between the proton i.e. observed at 8.276 ppm (C4-H) in proton NMR and the carbon observed at 126.07 ppm in carbon NMR.

Spot (1) show the correlation between the protons i.e. observed at 8.680 ppm (C1-H) in proton NMR and the carbon observed at 124.85 ppm in carbon NMR.

Spot (11) show the correlation between the proton i.e. observed at 7.601 ppm (C11-H) in proton NMR and the carbon observed at 130.01 ppm in carbon NMR.

Spot (2, 3) show the correlation between the proton i.e. observed multiplet for 2H at 7.731 ppm (C-2, 3) in proton NMR and the carbon observed at 131.93 (C2-H) and 132.12 (C3-H) ppm in carbon NMR.

Spot (9) show the correlation between the proton i.e. observed at 7.269 ppm (C9-H) in proton NMR and the carbon observed at 132.66 ppm in carbon NMR.

Savitribai Phule Pune University - Central Instrumentation Facility

**Analysis Info**  
 Analysis Name D:\Data\DR.SALUNKE\DATATRAY CHADAR\3B\_BA4\_01\_467.d Acquisition Date 3/10/2015 11:18:00 AM  
 Method hplc-ms600mz.m Operator CIF  
 Sample Name 3B Instrument impact HD 1819696.00184  
 Comment

**Acquisition Parameter**

|             |         |                      |          |                  |           |
|-------------|---------|----------------------|----------|------------------|-----------|
| Source Type | ESI     | Ion Polarity         | Positive | Set Nebulizer    | 0.3 Bar   |
| Focus       | Active  | Set Capillary        | 3800 V   | Set Dry Heater   | 200 °C    |
| Scan Begin  | 50 m/z  | Set End Plate Offset | -500 V   | Set Dry Gas      | 4.0 l/min |
| Scan End    | 600 m/z | Set Charging Voltage | 2000 V   | Set Divert Valve | Waste     |
|             |         | Set Corona           | 0 nA     | Set APCI Heater  | 0 °C      |

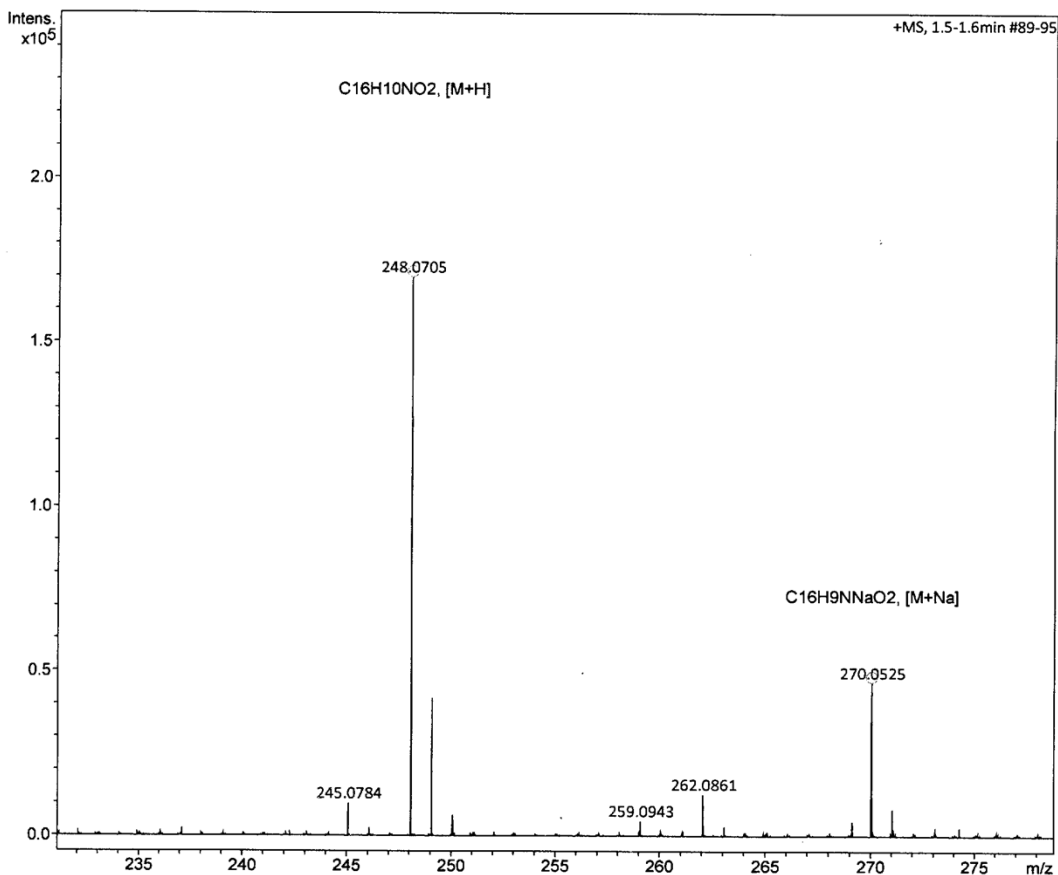

| Meas. m/z | # | Ion Formula | m/z      | err [ppm] | mSigma | # mSigma | Score  | rdb  | e <sup>-</sup> Conf | N-Rule | Adduct |
|-----------|---|-------------|----------|-----------|--------|----------|--------|------|---------------------|--------|--------|
| 248.0705  | 1 | C16H10NO2   | 248.0706 | 0.2       | 39.9   | 1        | 100.00 | 12.5 | even                | ok     | M+H    |
| 270.0525  | 1 | C16H9NNaO2  | 270.0525 | 0.1       | 3.3    | 1        | 100.00 | 12.5 | even                | ok     | M+Na   |

3B\_BA4\_01\_467.d

Bruker Compass DataAnalysis 4.2

printed: 3/10/2015 11:57:03 AM

by: CIF

Page 1 of 1

Fig. S9 HR-MS spectra of **3B**

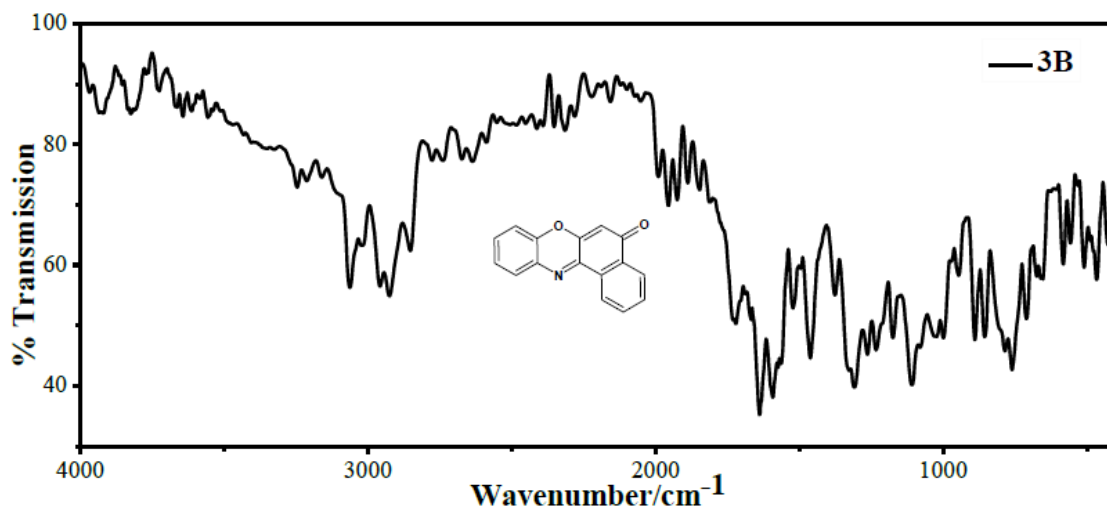

Fig. S10 FT-IR spectrums of **3B** in region 400 cm<sup>-1</sup> to 4000 cm<sup>-1</sup>

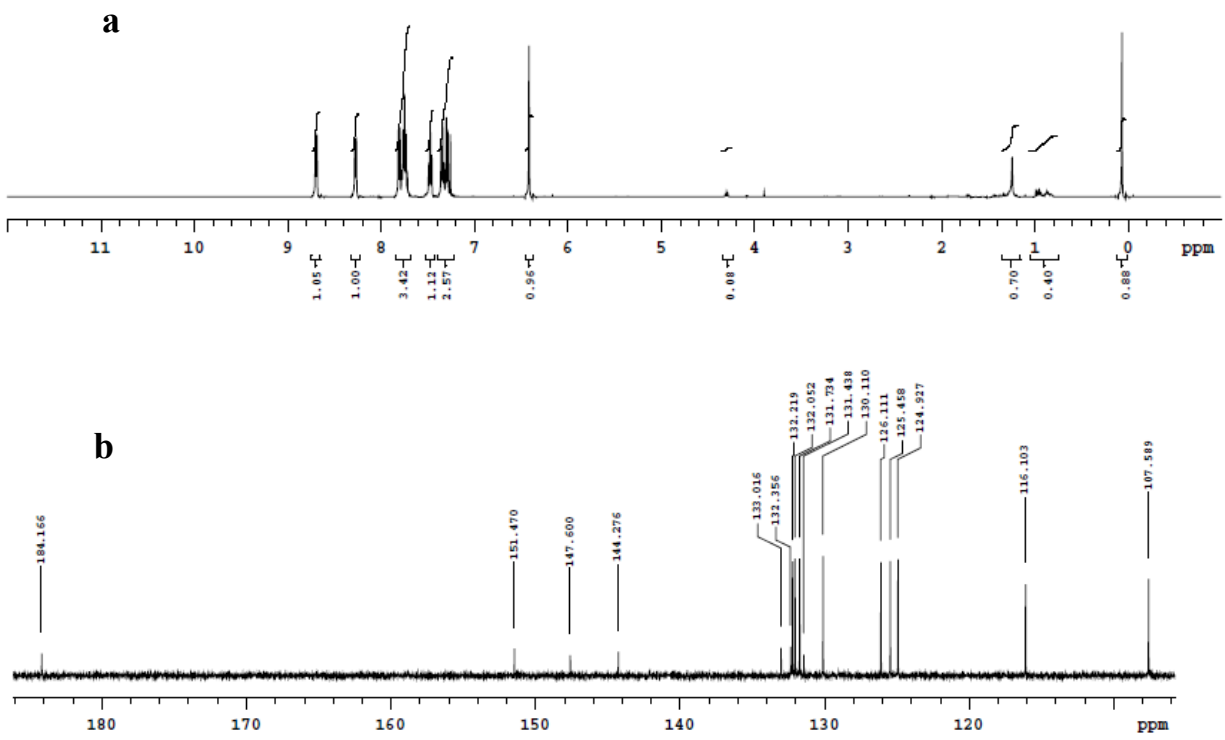

Fig. S11 a)  $^1\text{H}$ , b)  $^{13}\text{C}$  NMR spectra of **3B**



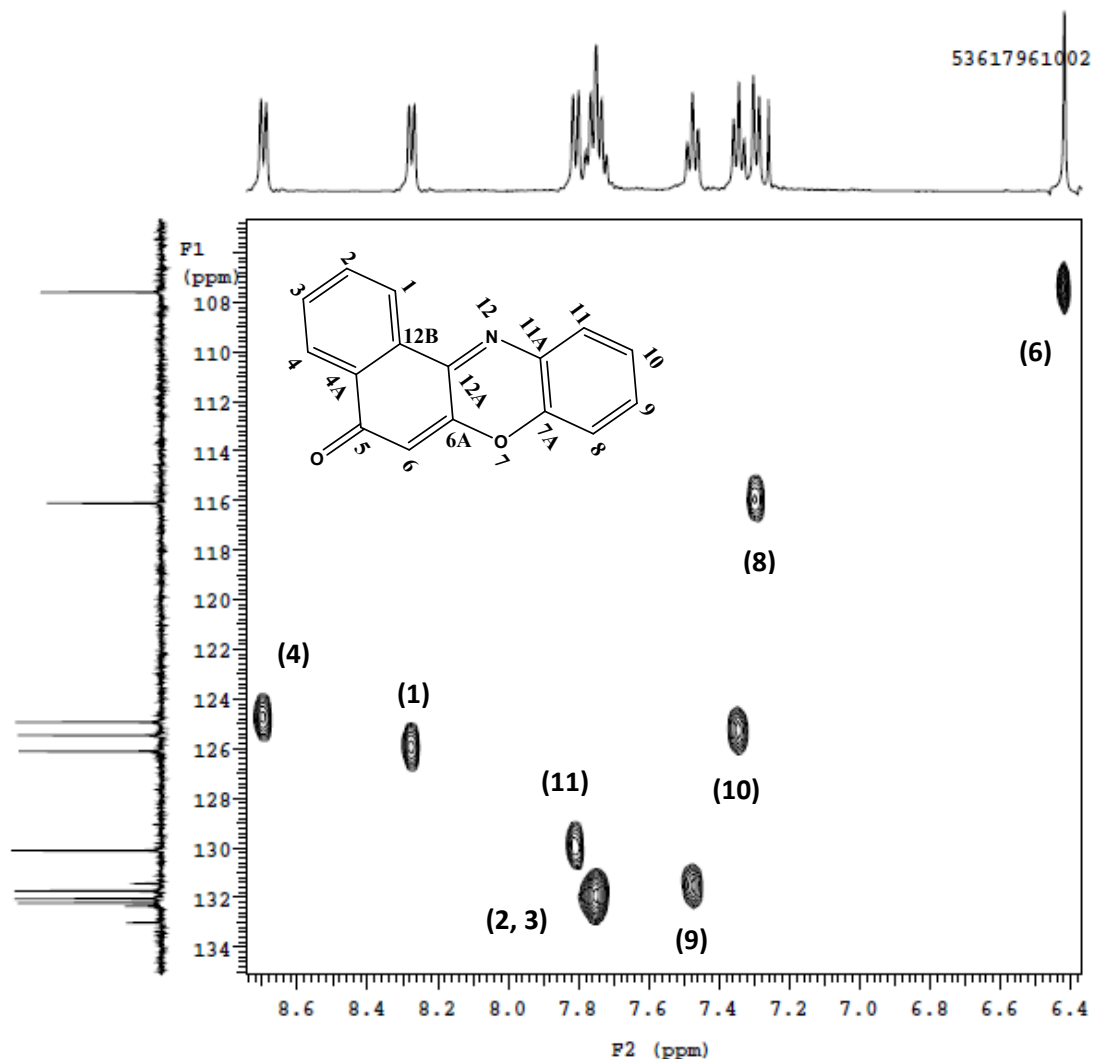

Fig. S12 2D gHSQCAD NMR spectra of **3B**

**Interpretation of the 2D gHSQCAD NMR of 3B that shows the correlation between the Carbon and Proton.**

Spot (6) show the correlation between the proton i.e. observed at 6.419 ppm (C6-H) in proton NMR and the carbon observed at 107.58 ppm in carbon NMR.

Spot (8) show the correlation between the proton i.e. observed at 7.260 ppm (C8-H) in proton NMR and the carbon observed at 116.10 ppm in carbon NMR.

Spot (1) show the correlation between the proton i.e. observed at 8.696 ppm (C1-H) in proton NMR and the carbon observed at 124.11 ppm in carbon NMR.

Spot (4) show the correlation between the proton i.e. observed at 8.274 ppm (C4-H) in proton NMR and the carbon observed at 126.11 ppm in carbon NMR.

Spot (10) show the correlation between the proton i.e. observed at 7.475 ppm (C10-H) in proton NMR and the carbon observed at 125.45 ppm in carbon NMR.

Spot (11) show the correlation between the proton i.e. observed at 7.808 ppm (C11-H) in proton NMR and the carbon observed at 130.11 ppm in carbon NMR.

Spot (2, 3) show the correlation between the proton i.e. observed multiplet for 2H at 7.766 ppm (C-2, 3) in proton NMR and the carbon observed at 132.05 (C2-H) and 132.21 (C3-H) ppm in carbon NMR.

Spot (9) show the correlation between the proton i.e. observed at 7.344 ppm (C9-H) in proton NMR and the carbon observed at 131.73 ppm in carbon NMR.

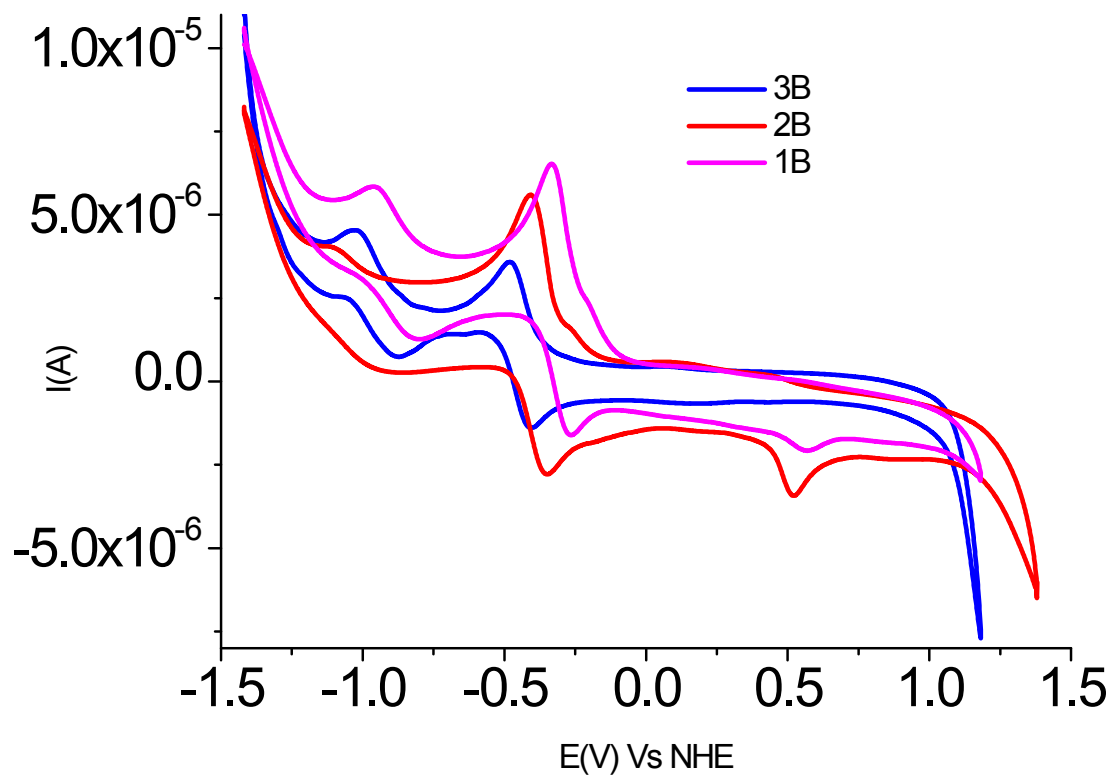

Fig.S13Cyclic voltammogram of **1B**, **2B** and **3B**

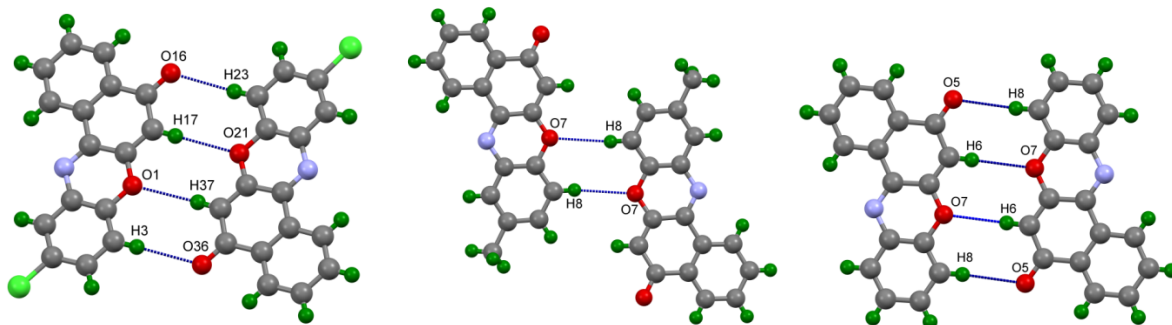

Fig.S14 Hydrogen bonding of oppositely oriented molecules of **1B** to **3B**

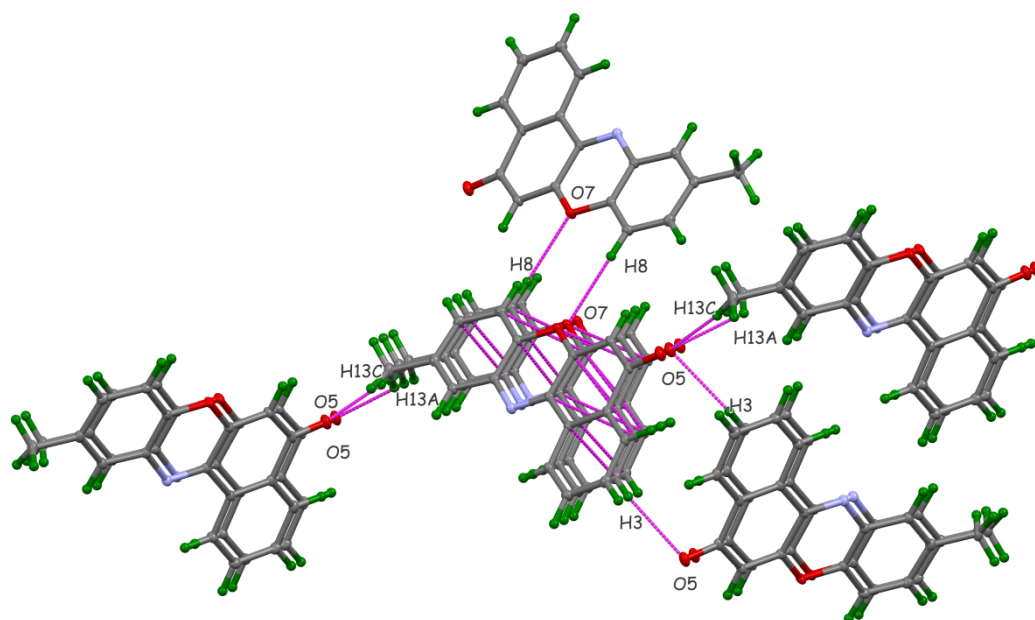

Fig.S15 Hydrogen bonding interactions to neighboring molecules of **2B**

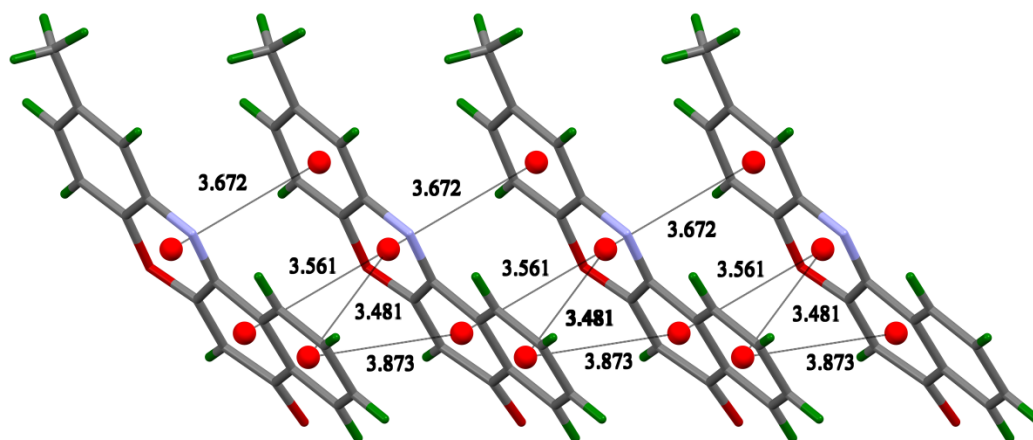

Fig.S16 Slipped  $\pi$ - $\pi$ stacked interaction in **2B**

a)

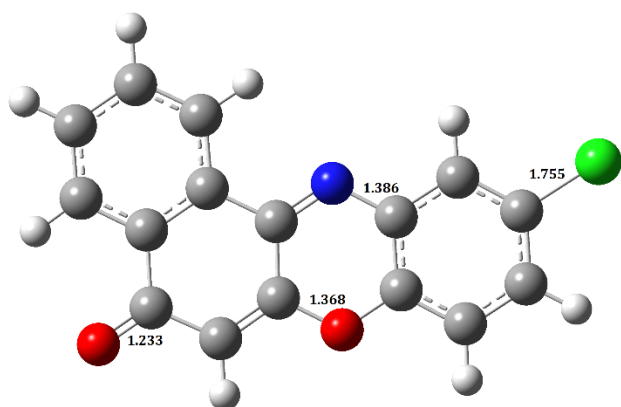

b)

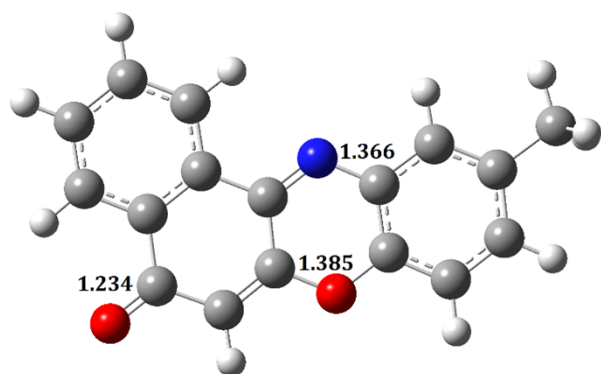

c)

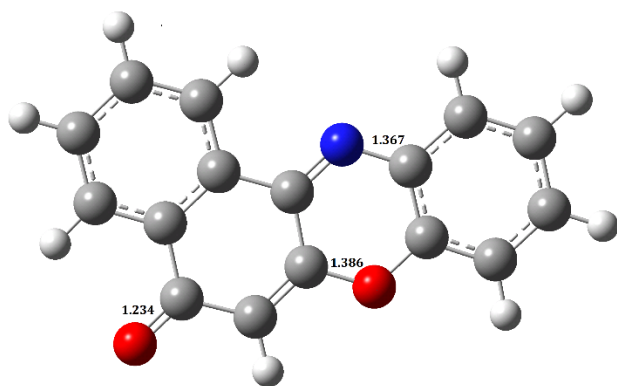

Fig.S17 Optimized structures of **1B**, **2B** and **3B** from the M06-2x theory.

Table S1 Bond lengths [Å] and angles [°] for 2B.

---

|                 |            |
|-----------------|------------|
| O(1)-C(2)       | 1.2337(12) |
| C(2)-C(19)      | 1.4522(14) |
| C(2)-C(3)       | 1.4894(14) |
| C(3)-C(4)       | 1.3998(14) |
| C(3)-C(8)       | 1.4042(14) |
| C(4)-C(5)       | 1.3869(14) |
| C(5)-C(6)       | 1.3967(15) |
| C(6)-C(7)       | 1.3890(14) |
| C(7)-C(8)       | 1.3985(14) |
| C(8)-C(9)       | 1.4676(14) |
| C(9)-N(10)      | 1.3008(13) |
| C(9)-C(18)      | 1.4609(13) |
| N(10)-C(11)     | 1.3934(13) |
| C(11)-C(16)     | 1.3937(13) |
| C(11)-C(12)     | 1.4002(14) |
| C(12)-C(13)     | 1.3920(14) |
| C(13)-C(14)     | 1.4006(15) |
| C(13)-C(20)     | 1.5074(15) |
| C(14)-C(15)     | 1.3895(14) |
| C(15)-C(16)     | 1.3870(14) |
| C(16)-O(17)     | 1.3789(12) |
| O(17)-C(18)     | 1.3666(12) |
| C(18)-C(19)     | 1.3505(14) |
|                 |            |
| O(1)-C(2)-C(19) | 121.63(9)  |
| O(1)-C(2)-C(3)  | 121.03(10) |
| C(19)-C(2)-C(3) | 117.34(9)  |
| C(4)-C(3)-C(8)  | 119.79(9)  |
| C(4)-C(3)-C(2)  | 119.47(9)  |
| C(8)-C(3)-C(2)  | 120.74(9)  |
| C(5)-C(4)-C(3)  | 120.27(9)  |
| C(4)-C(5)-C(6)  | 119.88(10) |
| C(7)-C(6)-C(5)  | 120.38(9)  |

|                   |            |
|-------------------|------------|
| C(6)-C(7)-C(8)    | 120.09(9)  |
| C(7)-C(8)-C(3)    | 119.59(9)  |
| C(7)-C(8)-C(9)    | 120.31(9)  |
| C(3)-C(8)-C(9)    | 120.11(9)  |
| N(10)-C(9)-C(18)  | 123.28(9)  |
| N(10)-C(9)-C(8)   | 119.71(9)  |
| C(18)-C(9)-C(8)   | 117.00(8)  |
| C(9)-N(10)-C(11)  | 117.07(8)  |
| N(10)-C(11)-C(16) | 121.92(9)  |
| N(10)-C(11)-C(12) | 119.40(9)  |
| C(16)-C(11)-C(12) | 118.68(9)  |
| C(13)-C(12)-C(11) | 121.08(9)  |
| C(12)-C(13)-C(14) | 118.34(9)  |
| C(12)-C(13)-C(20) | 120.80(9)  |
| C(14)-C(13)-C(20) | 120.85(9)  |
| C(15)-C(14)-C(13) | 121.81(10) |
| C(16)-C(15)-C(14) | 118.40(9)  |
| O(17)-C(16)-C(15) | 117.82(9)  |
| O(17)-C(16)-C(11) | 120.53(9)  |
| C(15)-C(16)-C(11) | 121.65(9)  |
| C(18)-O(17)-C(16) | 118.36(8)  |
| C(19)-C(18)-O(17) | 118.11(9)  |
| C(19)-C(18)-C(9)  | 123.38(9)  |
| O(17)-C(18)-C(9)  | 118.51(8)  |
| C(18)-C(19)-C(2)  | 120.97(9)  |

---



Table S2 Atomic coordinates ( $\times 10^4$ ) and equivalent isotropic displacement parameters ( $\text{\AA}^2 \times 10^3$ ) for **2B**.  $U(\text{eq})$  is defined as one third of the trace of the orthogonalized  $U^{ij}$  tensor

|       | x       | y        | z        | $U(\text{eq})$ |
|-------|---------|----------|----------|----------------|
| O(1)  | 9532(1) | 15519(2) | 1964(1)  | 17(1)          |
| C(2)  | 8909(1) | 14203(2) | 1518(1)  | 12(1)          |
| C(3)  | 7798(1) | 14974(2) | 1370(1)  | 11(1)          |
| C(4)  | 7443(1) | 17076(2) | 1778(1)  | 13(1)          |
| C(5)  | 6410(1) | 17805(2) | 1650(1)  | 14(1)          |
| C(6)  | 5721(1) | 16450(2) | 1110(1)  | 14(1)          |
| C(7)  | 6064(1) | 14357(2) | 702(1)   | 13(1)          |
| C(8)  | 7105(1) | 13614(2) | 826(1)   | 10(1)          |
| C(9)  | 7474(1) | 11432(2) | 391(1)   | 10(1)          |
| N(10) | 6844(1) | 10356(2) | -147(1)  | 11(1)          |
| C(11) | 7239(1) | 8298(2)  | -541(1)  | 11(1)          |
| C(12) | 6611(1) | 7187(2)  | -1148(1) | 12(1)          |
| C(13) | 6978(1) | 5132(2)  | -1556(1) | 13(1)          |
| C(14) | 7991(1) | 4162(2)  | -1339(1) | 14(1)          |
| C(15) | 8629(1) | 5209(2)  | -736(1)  | 13(1)          |
| C(16) | 8247(1) | 7304(2)  | -350(1)  | 11(1)          |
| O(17) | 8901(1) | 8409(2)  | 231(1)   | 12(1)          |
| C(18) | 8552(1) | 10588(2) | 592(1)   | 10(1)          |
| C(19) | 9224(1) | 11840(2) | 1122(1)  | 12(1)          |
| C(20) | 6299(1) | 3956(3)  | -2210(1) | 17(1)          |

**Table S3** Anisotropic displacement parameters ( $\text{\AA}^2 \times 10^3$ ) for **2B**. The anisotropic displacement factor exponent takes the form:  $-2\pi^2 [ h^2 a^{*2} U^{11} + \dots + 2 h k a^* b^* U^{12} ]$

|       | U <sup>11</sup> | U <sup>22</sup> | U <sup>33</sup> | U <sup>23</sup> | U <sup>13</sup> | U <sup>12</sup> |
|-------|-----------------|-----------------|-----------------|-----------------|-----------------|-----------------|
| O(1)  | 16(1)           | 17(1)           | 15(1)           | -2(1)           | -3(1)           | -2(1)           |
| C(2)  | 12(1)           | 11(1)           | 10(1)           | 3(1)            | -1(1)           | -2(1)           |
| C(3)  | 12(1)           | 10(1)           | 10(1)           | 2(1)            | 0(1)            | -1(1)           |
| C(4)  | 16(1)           | 12(1)           | 10(1)           | 0(1)            | 1(1)            | -1(1)           |
| C(5)  | 17(1)           | 12(1)           | 13(1)           | 0(1)            | 4(1)            | 1(1)            |
| C(6)  | 13(1)           | 14(1)           | 16(1)           | 1(1)            | 3(1)            | 2(1)            |
| C(7)  | 11(1)           | 13(1)           | 13(1)           | 0(1)            | 1(1)            | 0(1)            |
| C(8)  | 11(1)           | 9(1)            | 10(1)           | 1(1)            | 1(1)            | 0(1)            |
| C(9)  | 10(1)           | 9(1)            | 10(1)           | 2(1)            | 1(1)            | 0(1)            |
| N(10) | 11(1)           | 10(1)           | 11(1)           | 0(1)            | 1(1)            | 0(1)            |
| C(11) | 11(1)           | 10(1)           | 11(1)           | 1(1)            | 2(1)            | 0(1)            |
| C(12) | 12(1)           | 12(1)           | 12(1)           | 1(1)            | 0(1)            | 0(1)            |
| C(13) | 15(1)           | 12(1)           | 11(1)           | 1(1)            | 2(1)            | -2(1)           |
| C(14) | 16(1)           | 12(1)           | 13(1)           | -1(1)           | 5(1)            | 0(1)            |
| C(15) | 12(1)           | 13(1)           | 15(1)           | 1(1)            | 3(1)            | 1(1)            |
| C(16) | 11(1)           | 11(1)           | 11(1)           | 1(1)            | 1(1)            | -1(1)           |
| O(17) | 9(1)            | 13(1)           | 13(1)           | -2(1)           | -1(1)           | 2(1)            |
| C(18) | 10(1)           | 9(1)            | 11(1)           | 2(1)            | 2(1)            | 1(1)            |
| C(19) | 9(1)            | 12(1)           | 14(1)           | 1(1)            | -1(1)           | 0(1)            |
| C(20) | 20(1)           | 18(1)           | 12(1)           | -3(1)           | 0(1)            | -1(1)           |

Table S4 Hydrogen coordinates ( $\times 10^4$ ) and isotropic displacement parameters ( $\text{\AA}^2 \times 10^{-3}$ )

For **2B**

|        | x    | y     | z     | U(eq) |
|--------|------|-------|-------|-------|
| H(4)   | 7912 | 18006 | 2143  | 16    |
| H(5)   | 6171 | 19224 | 1930  | 17    |
| H(6)   | 5015 | 16963 | 1020  | 17    |
| H(7)   | 5591 | 13429 | 338   | 15    |
| H(12)  | 5922 | 7848  | -1284 | 14    |
| H(14)  | 8248 | 2750  | -1611 | 17    |
| H(15)  | 9311 | 4507  | -591  | 16    |
| H(19)  | 9913 | 11164 | 1236  | 15    |
| H(20A) | 5967 | 2183  | -2097 | 26    |
| H(20B) | 6716 | 3537  | -2560 | 26    |
| H(20C) | 5772 | 5382  | -2400 | 26    |

Table S5 Bond lengths [ $\text{\AA}$ ] and angles [ $^\circ$ ] for 3B

---

|                  |            |
|------------------|------------|
| C(1)-C(2)        | 1.374(2)   |
| C(1)-C(12B)      | 1.395(2)   |
| C(1)-H(1)        | 0.968(17)  |
| C(2)-C(3)        | 1.381(2)   |
| C(2)-H(2)        | 0.976(18)  |
| C(3)-C(4)        | 1.380(2)   |
| C(3)-H(3)        | 0.979(18)  |
| C(4)-C(4A)       | 1.388(2)   |
| C(4)-H(4)        | 0.989(18)  |
| C(4A)-C(12B)     | 1.404(2)   |
| C(4A)-C(5)       | 1.486(2)   |
| C(5)-O(5)        | 1.2350(18) |
| C(5)-C(6)        | 1.440(2)   |
| C(6)-C(6A)       | 1.343(2)   |
| C(6)-H(6)        | 0.949(17)  |
| C(6A)-O(7)       | 1.3605(18) |
| C(6A)-C(12A)     | 1.462(2)   |
| C(7)-C(8)        | 1.373(2)   |
| C(7)-O(7)        | 1.3802(18) |
| C(7)-C(11A)      | 1.393(2)   |
| C(8)-C(9)        | 1.374(2)   |
| C(8)-H(8)        | 0.926(16)  |
| C(9)-C(10)       | 1.385(2)   |
| C(9)-H(9)        | 0.965(16)  |
| C(10)-C(11)      | 1.370(2)   |
| C(10)-H(10)      | 0.961(19)  |
| C(11)-C(11A)     | 1.396(2)   |
| C(11)-H(11)      | 0.982(17)  |
| C(11A)-N(12)     | 1.3928(19) |
| C(12A)-N(12)     | 1.2988(18) |
| C(12A)-C(12B)    | 1.460(2)   |
| <br>             |            |
| C(2)-C(1)-C(12B) | 120.43(15) |
| C(2)-C(1)-H(1)   | 122.5(10)  |

|                    |            |
|--------------------|------------|
| C(12B)-C(1)-H(1)   | 117.0(10)  |
| C(1)-C(2)-C(3)     | 120.55(16) |
| C(1)-C(2)-H(2)     | 119.3(11)  |
| C(3)-C(2)-H(2)     | 120.2(11)  |
| C(4)-C(3)-C(2)     | 119.83(16) |
| C(4)-C(3)-H(3)     | 120.9(10)  |
| C(2)-C(3)-H(3)     | 119.3(10)  |
| C(3)-C(4)-C(4A)    | 120.56(17) |
| C(3)-C(4)-H(4)     | 121.2(10)  |
| C(4A)-C(4)-H(4)    | 118.3(10)  |
| C(4)-C(4A)-C(12B)  | 119.59(15) |
| C(4)-C(4A)-C(5)    | 120.12(15) |
| C(12B)-C(4A)-C(5)  | 120.28(14) |
| O(5)-C(5)-C(6)     | 121.29(15) |
| O(5)-C(5)-C(4A)    | 121.00(15) |
| C(6)-C(5)-C(4A)    | 117.70(14) |
| C(6A)-C(6)-C(5)    | 121.34(15) |
| C(6A)-C(6)-H(6)    | 120.9(10)  |
| C(5)-C(6)-H(6)     | 117.8(10)  |
| C(6)-C(6A)-O(7)    | 118.38(13) |
| C(6)-C(6A)-C(12A)  | 123.27(14) |
| O(7)-C(6A)-C(12A)  | 118.35(13) |
| C(8)-C(7)-O(7)     | 117.88(14) |
| C(8)-C(7)-C(11A)   | 122.14(15) |
| O(7)-C(7)-C(11A)   | 119.98(13) |
| C(6A)-O(7)-C(7)    | 119.23(12) |
| C(7)-C(8)-C(9)     | 118.44(16) |
| C(7)-C(8)-H(8)     | 118.4(10)  |
| C(9)-C(8)-H(8)     | 123.1(10)  |
| C(8)-C(9)-C(10)    | 120.90(17) |
| C(8)-C(9)-H(9)     | 118.7(9)   |
| C(10)-C(9)-H(9)    | 120.4(9)   |
| C(11)-C(10)-C(9)   | 120.34(17) |
| C(11)-C(10)-H(10)  | 120.0(11)  |
| C(9)-C(10)-H(10)   | 119.6(11)  |
| C(10)-C(11)-C(11A) | 120.02(16) |

|                     |            |
|---------------------|------------|
| C(10)-C(11)-H(11)   | 120.8(9)   |
| C(11A)-C(11)-H(11)  | 119.2(9)   |
| N(12)-C(11A)-C(7)   | 121.82(13) |
| N(12)-C(11A)-C(11)  | 120.02(14) |
| C(7)-C(11A)-C(11)   | 118.15(14) |
| N(12)-C(12A)-C(12B) | 120.14(13) |
| N(12)-C(12A)-C(6A)  | 123.00(13) |
| C(12B)-C(12A)-C(6A) | 116.86(13) |
| C(1)-C(12B)-C(4A)   | 119.04(14) |
| C(1)-C(12B)-C(12A)  | 120.46(14) |
| C(4A)-C(12B)-C(12A) | 120.50(13) |
| C(12A)-N(12)-C(11A) | 117.62(12) |

---

Table S5 Atomic coordinates ( $\times 10^4$ ) and equivalent isotropic displacement parameters ( $\text{\AA}^2 \times 10^3$ )

for **3B**,  $U(\text{eq})$  is defined as one third of the trace of the orthogonalized  $U^{ij}$  tensor.

|        | x        | y        | z       | $U(\text{eq})$ |
|--------|----------|----------|---------|----------------|
| C(1)   | 327(4)   | 1434(1)  | 5992(1) | 42(1)          |
| C(2)   | 998(5)   | 1993(1)  | 5722(2) | 48(1)          |
| C(3)   | 2800(4)  | 2349(1)  | 6453(1) | 48(1)          |
| C(4)   | 3934(4)  | 2143(1)  | 7463(2) | 46(1)          |
| C(4A)  | 3293(4)  | 1580(1)  | 7752(1) | 38(1)          |
| C(5)   | 4608(4)  | 1358(1)  | 8831(1) | 44(1)          |
| O(5)   | 6279(4)  | 1668(1)  | 9485(1) | 65(1)          |
| C(6)   | 3902(4)  | 769(1)   | 9081(1) | 42(1)          |
| C(6A)  | 2051(4)  | 433(1)   | 8375(1) | 36(1)          |
| C(7)   | -501(4)  | -468(1)  | 7959(1) | 36(1)          |
| O(7)   | 1370(3)  | -114(1)  | 8677(1) | 43(1)          |
| C(8)   | -1112(4) | -1019(1) | 8283(1) | 42(1)          |
| C(9)   | -2961(4) | -1376(1) | 7574(2) | 46(1)          |
| C(10)  | -4169(5) | -1185(1) | 6554(2) | 48(1)          |
| C(11)  | -3559(4) | -633(1)  | 6238(1) | 44(1)          |
| C(11A) | -1699(4) | -261(1)  | 6943(1) | 36(1)          |
| C(12A) | 714(4)   | 627(1)   | 7301(1) | 34(1)          |
| C(12B) | 1450(4)  | 1219(1)  | 7010(1) | 35(1)          |
| N(12)  | -1070(3) | 300(1)   | 6621(1) | 38(1)          |

Table S6 Anisotropic displacement parameters ( $\text{\AA}^2 \times 10^3$ ) for **3B**, The anisotropic displacement factor exponent takes the form:  $-2\pi^2 [ h^2 a^{*2} U^{11} + \dots + 2 h k a^* b^* U^{12} ]$

|        | U <sup>11</sup> | U <sup>22</sup> | U <sup>33</sup> | U <sup>23</sup> | U <sup>13</sup> | U <sup>12</sup> |
|--------|-----------------|-----------------|-----------------|-----------------|-----------------|-----------------|
| C(1)   | 46(1)           | 42(1)           | 38(1)           | 1(1)            | -4(1)           | 0(1)            |
| C(2)   | 54(1)           | 48(1)           | 41(1)           | 8(1)            | -1(1)           | 2(1)            |
| C(3)   | 52(1)           | 39(1)           | 53(1)           | 3(1)            | 5(1)            | 1(1)            |
| C(4)   | 51(1)           | 42(1)           | 46(1)           | -7(1)           | 3(1)            | -3(1)           |
| C(4A)  | 39(1)           | 39(1)           | 35(1)           | -4(1)           | 2(1)            | 4(1)            |
| C(5)   | 45(1)           | 47(1)           | 38(1)           | -8(1)           | -2(1)           | 2(1)            |
| O(5)   | 87(1)           | 57(1)           | 48(1)           | -6(1)           | -20(1)          | -14(1)          |
| C(6)   | 48(1)           | 46(1)           | 30(1)           | 0(1)            | -3(1)           | 4(1)            |
| C(6A)  | 38(1)           | 37(1)           | 33(1)           | 0(1)            | 3(1)            | 7(1)            |
| C(7)   | 36(1)           | 37(1)           | 36(1)           | -4(1)           | 3(1)            | 5(1)            |
| O(7)   | 55(1)           | 38(1)           | 35(1)           | 2(1)            | -5(1)           | 1(1)            |
| C(8)   | 46(1)           | 42(1)           | 39(1)           | 5(1)            | 4(1)            | 6(1)            |
| C(9)   | 45(1)           | 36(1)           | 56(1)           | 1(1)            | 6(1)            | 1(1)            |
| C(10)  | 48(1)           | 43(1)           | 53(1)           | -4(1)           | -4(1)           | -3(1)           |
| C(11)  | 47(1)           | 44(1)           | 41(1)           | 0(1)            | -4(1)           | 1(1)            |
| C(11A) | 36(1)           | 37(1)           | 37(1)           | -1(1)           | 2(1)            | 4(1)            |
| C(12A) | 32(1)           | 37(1)           | 31(1)           | -3(1)           | 1(1)            | 7(1)            |
| C(12B) | 34(1)           | 37(1)           | 33(1)           | -2(1)           | 4(1)            | 6(1)            |
| N(12)  | 43(1)           | 37(1)           | 34(1)           | 0(1)            | -1(1)           | 2(1)            |



Table S7 Hydrogen coordinates ( $\times 10^4$ ) and isotropic displacement parameters ( $\text{\AA}^2 \times 10^{-3}$ )  
for **3B**

|       | x         | y        | z        | U(eq) |
|-------|-----------|----------|----------|-------|
| H(1)  | -940(40)  | 1175(7)  | 5500(13) | 49(5) |
| H(2)  | 210(40)   | 2135(8)  | 5003(15) | 62(5) |
| H(3)  | 3280(40)  | 2744(8)  | 6241(13) | 54(5) |
| H(4)  | 5220(40)  | 2391(7)  | 8000(14) | 56(5) |
| H(6)  | 4750(40)  | 626(7)   | 9769(14) | 45(5) |
| H(8)  | -200(40)  | -1137(7) | 8959(13) | 45(5) |
| H(9)  | -3420(40) | -1763(7) | 7801(12) | 46(4) |
| H(10) | -5510(50) | -1439(8) | 6077(14) | 62(5) |
| H(11) | -4400(40) | -496(7)  | 5515(15) | 54(5) |

Table S8 Torsion angles [°] for **3B**

---

|                          |             |
|--------------------------|-------------|
| C(12B)-C(1)-C(2)-C(3)    | 0.2(3)      |
| C(1)-C(2)-C(3)-C(4)      | -0.1(3)     |
| C(2)-C(3)-C(4)-C(4A)     | 0.3(3)      |
| C(3)-C(4)-C(4A)-C(12B)   | -0.5(2)     |
| C(3)-C(4)-C(4A)-C(5)     | 178.32(14)  |
| C(4)-C(4A)-C(5)-O(5)     | 0.0(2)      |
| C(12B)-C(4A)-C(5)-O(5)   | 178.85(15)  |
| C(4)-C(4A)-C(5)-C(6)     | -179.25(15) |
| C(12B)-C(4A)-C(5)-C(6)   | -0.4(2)     |
| O(5)-C(5)-C(6)-C(6A)     | 179.22(15)  |
| C(4A)-C(5)-C(6)-C(6A)    | -1.5(2)     |
| C(5)-C(6)-C(6A)-O(7)     | -177.62(14) |
| C(5)-C(6)-C(6A)-C(12A)   | 2.0(2)      |
| C(6)-C(6A)-O(7)-C(7)     | -179.40(13) |
| C(12A)-C(6A)-O(7)-C(7)   | 1.0(2)      |
| C(8)-C(7)-O(7)-C(6A)     | 179.24(13)  |
| C(11A)-C(7)-O(7)-C(6A)   | -0.7(2)     |
| O(7)-C(7)-C(8)-C(9)      | -179.77(13) |
| C(11A)-C(7)-C(8)-C(9)    | 0.2(2)      |
| C(7)-C(8)-C(9)-C(10)     | 0.3(2)      |
| C(8)-C(9)-C(10)-C(11)    | -0.5(3)     |
| C(9)-C(10)-C(11)-C(11A)  | 0.2(3)      |
| C(8)-C(7)-C(11A)-N(12)   | 179.98(14)  |
| O(7)-C(7)-C(11A)-N(12)   | -0.1(2)     |
| C(8)-C(7)-C(11A)-C(11)   | -0.4(2)     |
| O(7)-C(7)-C(11A)-C(11)   | 179.51(13)  |
| C(10)-C(11)-C(11A)-N(12) | 179.82(15)  |
| C(10)-C(11)-C(11A)-C(7)  | 0.2(2)      |
| C(6)-C(6A)-C(12A)-N(12)  | 179.89(14)  |
| O(7)-C(6A)-C(12A)-N(12)  | -0.5(2)     |
| C(6)-C(6A)-C(12A)-C(12B) | -0.5(2)     |
| O(7)-C(6A)-C(12A)-C(12B) | 179.11(12)  |
| C(2)-C(1)-C(12B)-C(4A)   | -0.4(2)     |
| C(2)-C(1)-C(12B)-C(12A)  | 179.48(15)  |

|                            |             |
|----------------------------|-------------|
| C(4)-C(4A)-C(12B)-C(1)     | 0.6(2)      |
| C(5)-C(4A)-C(12B)-C(1)     | -178.27(14) |
| C(4)-C(4A)-C(12B)-C(12A)   | -179.30(14) |
| C(5)-C(4A)-C(12B)-C(12A)   | 1.9(2)      |
| N(12)-C(12A)-C(12B)-C(1)   | -1.7(2)     |
| C(6A)-C(12A)-C(12B)-C(1)   | 178.69(13)  |
| N(12)-C(12A)-C(12B)-C(4A)  | 178.17(13)  |
| C(6A)-C(12A)-C(12B)-C(4A)  | -1.4(2)     |
| C(12B)-C(12A)-N(12)-C(11A) | -179.86(13) |
| C(6A)-C(12A)-N(12)-C(11A)  | -0.3(2)     |
| C(7)-C(11A)-N(12)-C(12A)   | 0.6(2)      |
| C(11)-C(11A)-N(12)-C(12A)  | -179.02(14) |

---
